# Supplementary material for: A hierarchical Nb2O5@NiFe-MMO rod array, fabricated and used as a structured photocatalyst
Source: Royal Society of Chemistry journal article supplement (doi:10.1039/c8ra10432h), 2019-01-01
Supplement: c8ra10432h1.pdf [file c8ra10432h1.pdf]

## Supporting information

### **Nb<sub>2</sub>O<sub>5</sub>@NiFe-MMO rod array used as structured photocatalyst with selective aerobic oxidation of benzylamine to imine**

*Fei Liu<sup>a</sup>, Yuwei Wang<sup>a</sup>, Xianggui Kong<sup>a\*</sup>, Deqiang Lei<sup>b</sup>, Xiaodong Lei<sup>a\*</sup>*

*a. State Key Laboratory of Chemical Resource Engineering, Beijing University of Chemical Technology, Beijing 100029, China.*

*b. Department of Neurosurgery, Union Hospital, Tongji Medical College, Huazhong University of Science and Technology, Wuhan 430022, China.*

*\* Corresponding authors: E-mail: kongxg@mail.buct.edu.cn (X. Kong);*

*leixd@mail.buct.edu.cn (X. Lei). Fax: +86-10-64425385; Tel: +86-10-64455357*

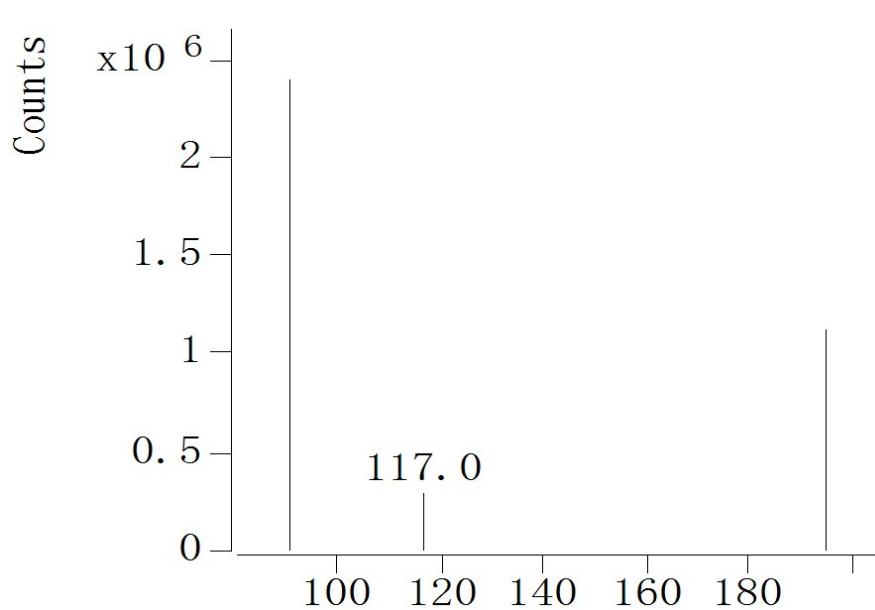

**Figure S1** MS spectrum of self-coupling of benzylamines. Reaction conditions: amine (0.35 mmol), catalyst (1\*3cm), O<sub>2</sub> balloon, room temperature.5 h.

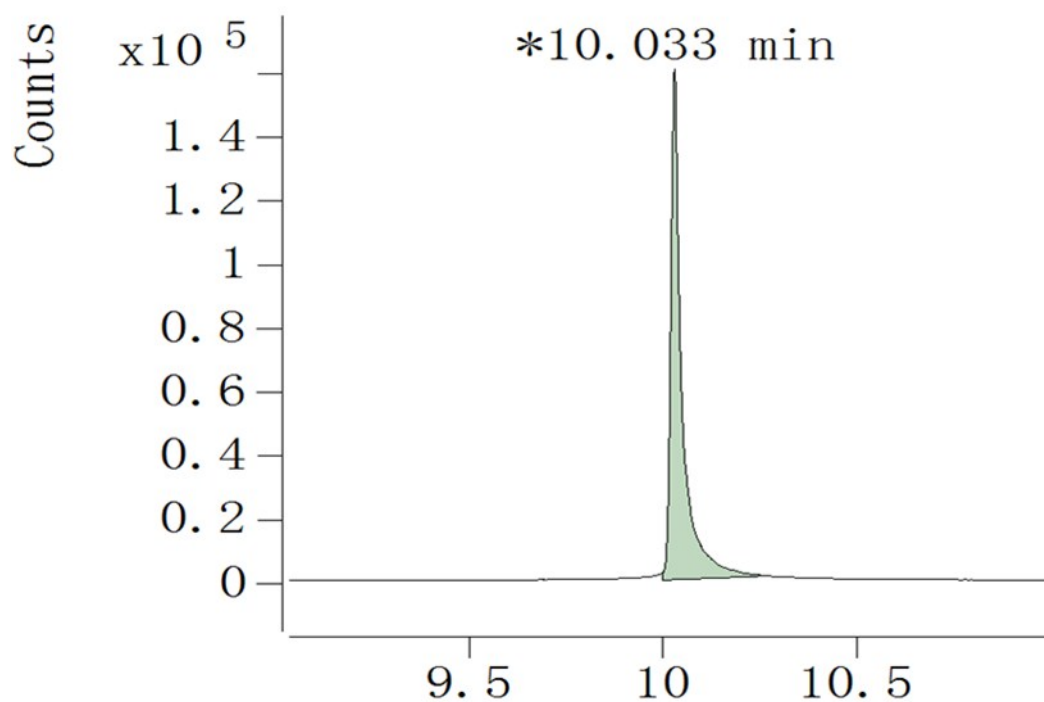

**Figure S2** GC spectrum of self-coupling of benzylamines. Reaction conditions: amine (0.35 mmol), catalyst (1\*3cm), O<sub>2</sub> balloon, room temperature.5 h.

**Table S1.** A summary of the performance of various semimetal oxide catalysts in the oxidation of benzylamine. Reaction conditions: catalyst (100 mg) and this work catalyst( $1 \times 3 \text{ cm}^2$ ), benzylamine (0.5 mmol), acetonitrile solvent (10 mL), visible light irradiation (5 h), oxygen pressure (1 atm).

| <b>Entry</b> | <b>Catalyst</b>                | <b>Yield</b>                         |
|--------------|--------------------------------|--------------------------------------|
| 1            | Nb <sub>2</sub> O <sub>5</sub> | 228 $\mu\text{mol/mg cat}$           |
| 2            | ZrO <sub>2</sub>               | 175 $\mu\text{mol/mg cat}$           |
| 3            | WO <sub>3</sub>                | 143 $\mu\text{mol/mg cat}$           |
| 4            | This work                      | 314 $\mu\text{mol/cm}^2 \text{ cat}$ |
